# Supplementary material
Source: publisher figshare collection journal article supplement (https://acs.figshare.com/ndownloader/files/3735592)
Supplement: Supplementary file 1 [file 3735592]

## Supporting Information

# Scandium-Triflate/Metal-Organic Frameworks: Remarkable Adsorbents for Desulfurization and Denitrogenation

*Nazmul Abedin Khan and Sung Hwa Jhung\**

Department of Chemistry and Green-Nano Materials Research Center, Kyungpook National  
University, Daegu 702-701, Korea

\*Corresponding Author: Prof. Sung Hwa Jhung

Fax: 82-53-950-6330, Tel: 82-53-950-5341

Email: [sung@knu.ac.kr](mailto:sung@knu.ac.kr)

## Experimental:

**Syntheis of CuBTC:** The synthesis of CuBTC was performed as previously described.<sup>1</sup> In short, an exact amount of H<sub>3</sub>BTC (2.0 mmol) and copper (II) nitrate trihydrate (3.65 mmol) was dissolved in 24 mL of a 1:1 (wt./wt.) mixture of H<sub>2</sub>O and CH<sub>3</sub>CH<sub>2</sub>OH, and magnetically stirred for 10 min. The resulting mixtures were loaded into a Teflon autoclave that was sealed and placed in a microwave oven (Mars-5, CEM, maximum power: 1200 W) to exploit the advantage of fast synthesis under microwave irradiations.<sup>2</sup> After heating for 1.0 h at 140 °C, the autoclave was allowed to cool to room temperature and the products were collected *via* centrifugation. The products were washed with a water/ethanol mixture to remove any unreacted trimesic acid and dried overnight at 100 °C.

**Syntheis of UiO-66:** The synthesis of the MOF, UiO-66, was carried out solvothermally under conventional electric heating following a previous report<sup>3</sup> with a few modifications. The detailed procedure for the synthesis of the MOF is as follows: ZrCl<sub>4</sub> (1.129 g), TPA (1.626 g), HCl (1.009 g) and DMF (27.04 g) were mixed in a molar ratio of 1:2:2:76. The mixture was then transferred to a 100 mL Teflon-lined autoclave and heated in an electric oven for 24 h at 180 °C. After the synthesis, the solid product was filtered, washed, and purified by mixing with DMF and heating at 150 °C for 5 h. For 1 g of MOF, 50 mL of DMF was used in the purification process. The purified MOF was then filtered and dried in a vacuum oven at 150 °C for 12 h to remove the remaining DMF.

**Synthesis of MIL-101:** MIL-101 was synthesized from Cr(NO<sub>3</sub>)<sub>3</sub>·9H<sub>2</sub>O, TPA and deionized water similar to a reported method.<sup>4</sup> The reactants composition was 1.0 Cr(NO<sub>3</sub>)<sub>3</sub>·6H<sub>2</sub>O : 1.0 TPA : 300 H<sub>2</sub>O. The precursor of 30 g was loaded in a Teflon-lined autoclave and put in a preheated electric oven at 210 °C for 8 h. After the reaction, the autoclave was cooled to room temperature and solid green-colored products were recovered

by filtration. After synthesis, the MOF was purified in three steps.<sup>5</sup> In the first step, 1.0 g MIL-101 was added to 300 mL water and stirred magnetically for 5 h at 70 °C. Then the MOF was filtered and dried overnight in a drying oven. In the second step, the dried MOF was added to 250 mL ethanol; stirred magnetically at 60 °C for 3 h and then filtered. In the third step, the dried MOF from the second step was added to 150 mL 30 mM NH<sub>4</sub>F solution and stirred for 10 h at 60 °C. After that, it was filtered and washed at least five times with hot water and then dried in a drying oven again. Finally, the purified MIL-101 was dehydrated at 150 °C overnight and stored in a desiccator.

**Adsorption experiments:** All the adsorption capacities (mg/g) were calculated from the difference between final and initial concentrations of an adsorbate by using following equation:

$$q_t = \frac{(C_i - C_f)V}{m}$$

Where,

$q_t$  = adsorbed amount in time t (mg/g)

$C_i$  = initial concentration of the adsorbate (mg/ml)

$C_f$  = final concentration after adsorption (mg/ml)

$V$  = volume of the solution subjected to a single adsorption (ml)

$m$  = mass of the adsorbent taken during a single adsorption (g)

**Calculation of maximum adsorption capacity ( $Q_0$ ):** The maximum adsorption capacity ( $Q_0$ ) was calculated using the Langmuir adsorption isotherm. The adsorption isotherms for different adsorbents were plotted according to the Langmuir equation<sup>6,7</sup>

$$\frac{C_e}{q_e} = \frac{C_e}{Q_0} + \frac{1}{Q_0 b}$$

Where,

$C_e$  : the equilibrium concentration of the adsorbate (mg/L)

$q_e$  : the amount adsorbed at equilibrium (mg/g)

$Q_o$  : the Langmuir constant (maximum adsorption capacity, mg/g)

$b$  : the Langmuir constant (L/mg)

Therefore, the maximum adsorption capacity,  $Q_o$ , could be obtained from the reciprocal of the slope of a plot of  $C_e/q_e$  against  $C_e$ .

**Adsorption kinetics:** Kinetics of BT or DBT adsorption has been interpreted by the pseudo-second-order non-linear kinetic model<sup>8,9</sup> which is expressed by the following equation.

$$q_t = \frac{q_e^2 k_2 t}{1 + q_e k_2 t}$$

Where,

$q_e$  (mg/g): amount adsorbed at equilibrium;

$q_t$  (mg/g): amount adsorbed at time  $t$ ;

$t$  (h): adsorption time;

$k_2$  (g/mg/h): the pseudo-second-order rate constant.

A trial-and-error procedure<sup>8</sup> was adapted to measure the pseudo-second order kinetic parameters in the case of non-linear method by using the solver add-in with Microsoft's spreadsheet, Microsoft Excel.

**Separation factor:** The separation factor ( $R_L$ ) was calculated using the following equation that describes the adsorption process.<sup>10-12</sup>

$$R_L = \frac{1}{1 + bC_o}$$

Where,

$R_L$ : separation factor

$b$ : the Langmuir constant (L/mg)

$C_0$ : initial concentration of adsorbate (mg/L)

**Adsorbent regeneration:** The used adsorbents were reactivated for further utilization following the two consecutive procedure. Firstly, the used adsorbent was soaked into *n*-octane solvent and allowed to stirr 12 h at room temperature. While, the solvent was exchanged three times with fresh *n*-octane to wash out the adsorbed BT or QUI from the adsorbent. In next step, the solid adsorbent was filtered and dried at 100 °C for 12 h. Then the dried adsorbent was heated at 230 °C under evacuation to evaporate the remaining adsorbed materials.

## Reference:

- [1] Seo, Y.-K.; Hundal, G.; Jang, I.T.; Hwang, Y.K.; Jun, C.-H.; Chang, J.-S. *Micropor. Mesopor. Mater.* **2009**, *119*, 331-337.
- [2] Khan, N.A.; Jhung, S.H. *Coord. Chem. Rev.* **2015**, *285*, 11–23.
- [3] Kandiah, M.; Nilsen, M.H.; Usseglio, S.; Jakobsen, S.; Olsbye, U.; Tilset, M.; Larabi, C.; Quadrelli, E.A.; Bonino, F.; Lillerud, K.P. *Chem. Mater.* **2010**, *22*, 6632–6640.
- [4] Khan, N.A.; Jhung, S.H. *Cryst. Growth Des.* **2010**, *10*, 1860-1865.
- [5] Hong, D.-Y.; Hwang, Y.K.; Serre, C.; Ferey G.; Chang, J.-S. *Adv. Funct. Mater.* **19**, **2009**, 1537–1552.
- [6] Hameed, B.H.; Rahman, A.A.; *J. Hazard. Mater.* **2008**, *160*, 576-581.
- [7] Lin, S.-H.; Juang, R.-S. *J. Environ. Manag.* **2009**, *90*, 1336-1349.
- [8] Ho, Y. -S. *Water Res.* **2006**, *40*, 119-125.
- [9] Nouri, L.; Ghodbane, I.; Hamdaoui, O.; Chiha, M. *J. Hazard. Mater.* **2007**, *149*, 115–125.
- [10] Weber, T.W.; Chakkravorti, R.K. *AIChE J.* **1974**, *20*, 228-238.
- [11] Önal, Y.; Akmil-Basar, C.; Sarıcı-Özdemir, C. *J. Hazard. Mater.* **2007**, *148*, 727-734.
- [12] Singh, K.P.; Mohan, D.; Sinha, S.; Tondon, G.S. *Ind. Eng. Chem. Res.* **2003**, *42*, 1965-1976.
- [13] Khan, N.A.; Jhung, S.H. *Angew. Chem. Int. Ed.* **2012**, *51*, 1198-1201.
- [14] Khan, N.A.; Jhung, S.H. *J. Hazard. Mater.* **2012**, *237-238*, 180-185.
- [15] Khan, N.A.; Hasan, Z.; Jhung, S.H. *Chem. Eur. J.* **2014**, *20*, 376-380.
- [16] Khan, N.A.; Jhung, S.H. *Fuel Process. Technol.* **2012**, *100*, 49-54.
- [17] Hasan, Z.; Jhung, S.H. *ACS Appl. Mater. Interfaces* **2015**, *7*, 10429-10435.

**Table S1. Physiochemical properties of virgin and Sc(OTf)<sub>3</sub>-supported MOFs.**

|                | S <sub>BET</sub> ,<br>m <sup>2</sup> /g | Pore volume (total),<br>cm <sup>3</sup> /g | S, wt% <sup>[a]</sup> | Sc, wt% <sup>[a]</sup> |
|----------------|-----------------------------------------|--------------------------------------------|-----------------------|------------------------|
| CuBTC          | 1427                                    | 0.70                                       | 0.0                   | 0.0                    |
| CuBTC(1%Sc)    | 1340                                    | 0.68                                       |                       |                        |
| CuBTC(2%Sc)    | 1239                                    | 0.63                                       | 0.51                  | 0.25                   |
| CuBTC(5%Sc)    | 1218                                    | 0.62                                       |                       |                        |
| CuBTC(7.5%Sc)  | 1187                                    | 0.61                                       |                       |                        |
| CuBTC(10%Sc)   | 1131                                    | 0.57                                       |                       |                        |
| MIL-101        | 2902                                    | 1.62                                       |                       |                        |
| MIL-101(1%Sc)  | 2730                                    | 1.53                                       |                       |                        |
| MIL-101(5%Sc)  | 2396                                    | 1.21                                       |                       |                        |
| MIL-101(10%Sc) | 1579                                    | 0.79                                       |                       |                        |

<sup>[a]</sup> Based on energy dispersive spectroscopic (EDS) analysis

**Table S2. Increment% of maximum adsorption capacity ( $Q_o$ ) for BT with MOFs having various active components at similar adsorption condition.**

| Adsorbents                   | $Q_o$ increased % | Reference |
|------------------------------|-------------------|-----------|
| Sc(OTf) <sub>3</sub> /CuBTC  | 64.7              | This work |
| CuCl <sub>2</sub> /MIL-47    | 34.2              | [13]      |
| Cu <sub>2</sub> O/MIL-100-Fe | 14.1              | [14]      |
| Ionic liquid/MIL-101         | 70.6              | [15]      |
| Phosphotungstic acid/CuBTC   | 26.3              | [16]      |
| Cu-pyrazine/MIL-100-Fe       | 12.3              | [17]      |



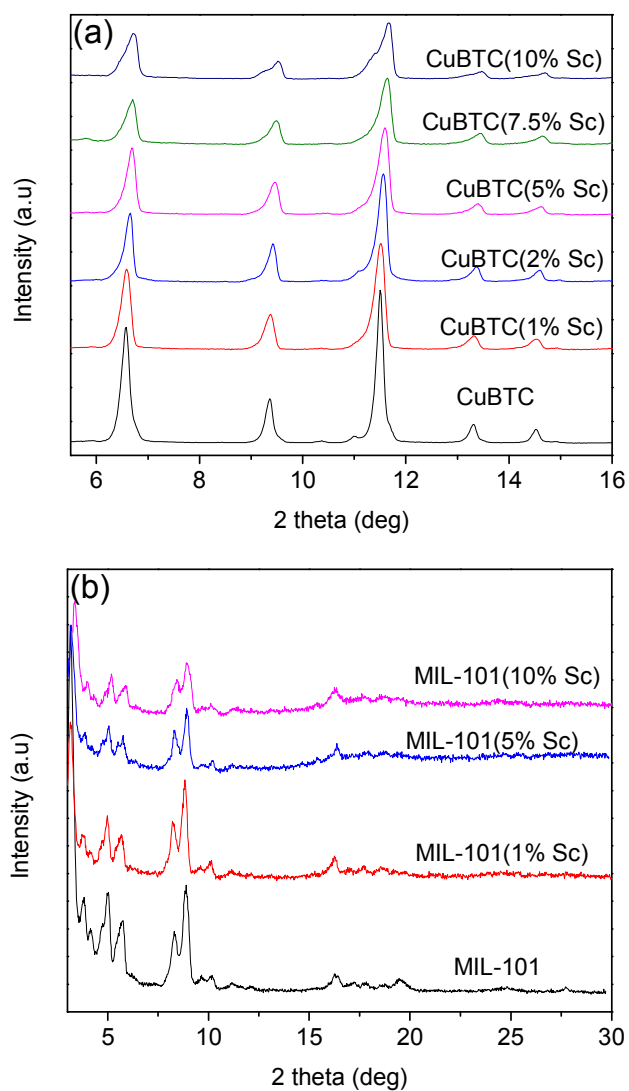

**Figure S1.** XRD patterns of (a) virgin and Sc(OTf)<sub>3</sub>-supported CuBTCs; and (b) virgin and Sc(OTf)<sub>3</sub>-supported MIL-101s.

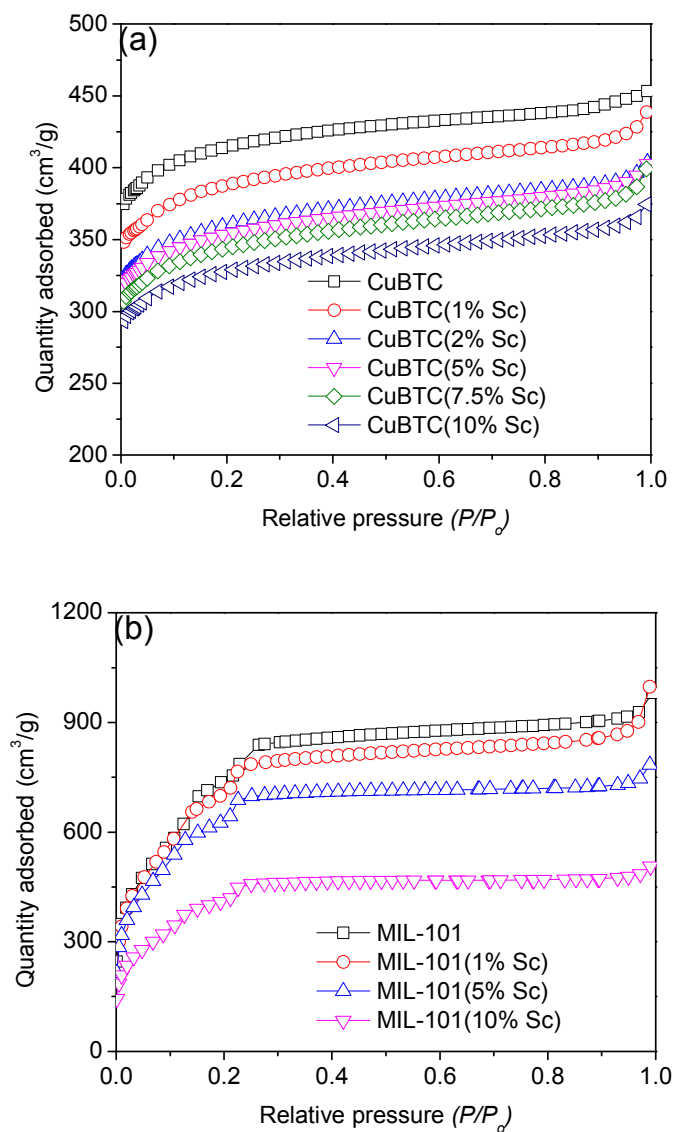

**Figure S2.** N<sub>2</sub> adsorption isotherms of (a) virgin and Sc(OTf)<sub>3</sub>-supported CuBTCs; and (b) virgin and Sc(OTf)<sub>3</sub>-supported MIL-101s.

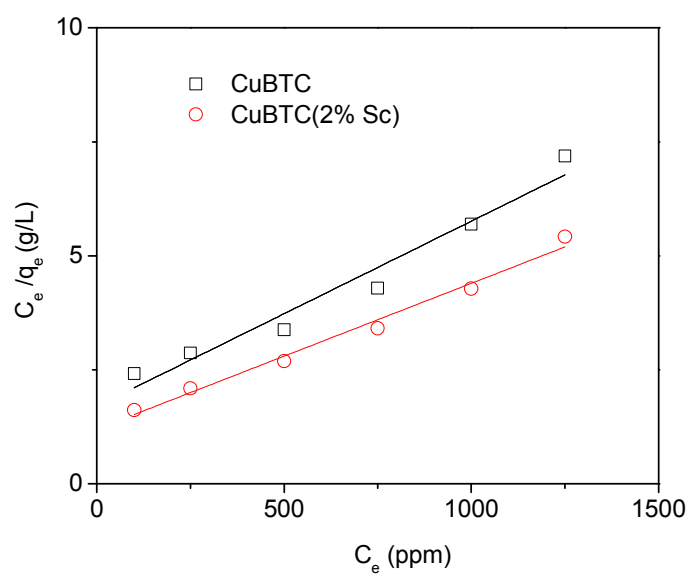

**Figure S3.** Langmuir plots of the adsorption of DBT over CuBTC and CuBTC(2%Sc).

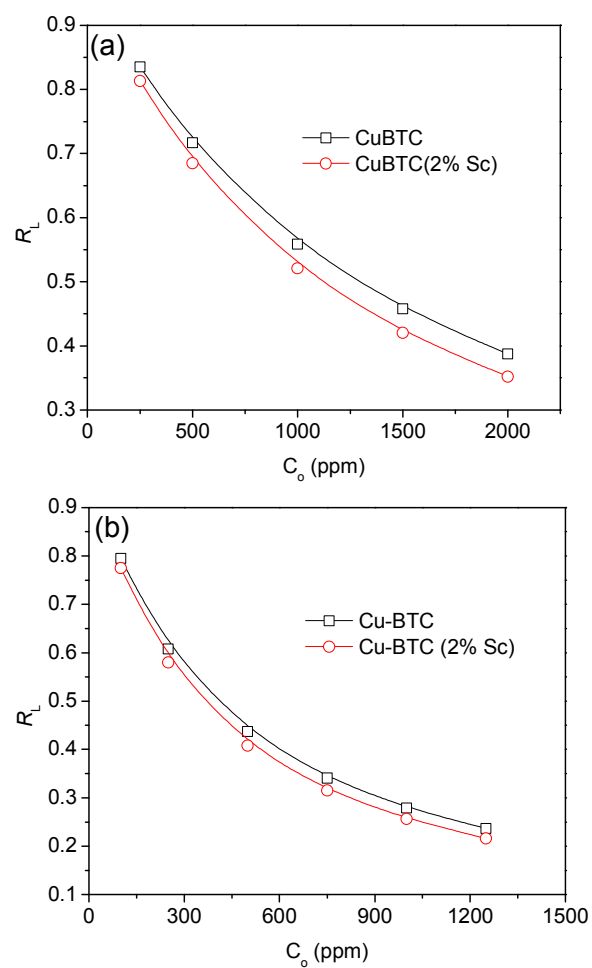

**Figure S4.**  $R_L$  values of the two adsorbents in different initial concentrations of (a) BT; (b) DBT.

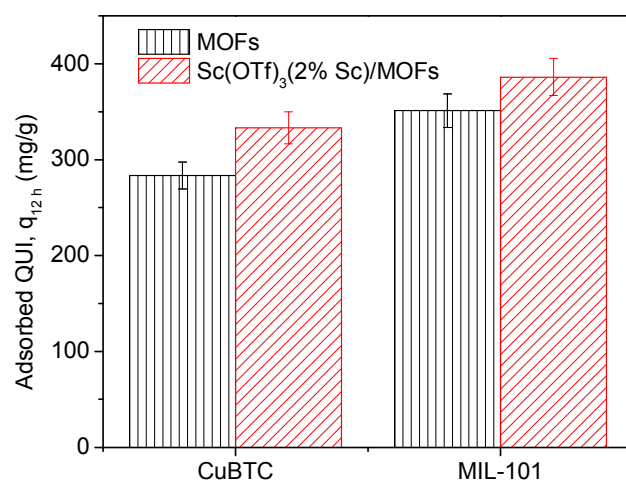

**Figure S5.** Adsorption of QUI with virgin and Sc(OTf)<sub>3</sub>-supported adsorbents. The initial QUI concentration in n-octane solvent was 1000 ppm and the adsorption time was 12 h.

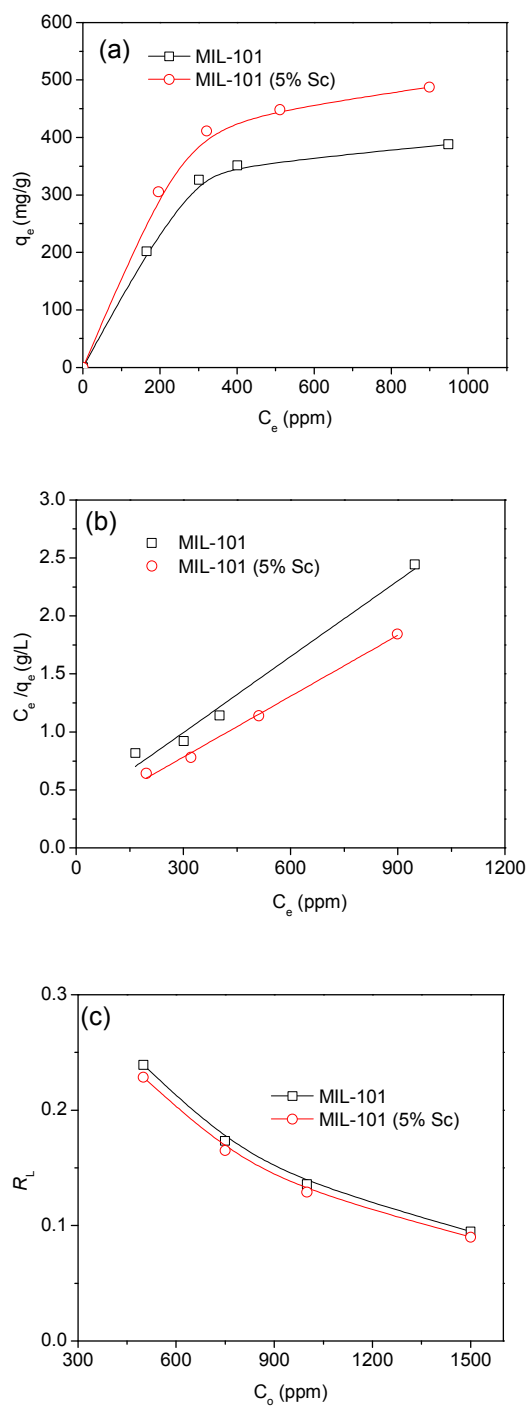

**Figure S6.** (a) Adsorption isotherms and (b) Langmuir plots and (c) effect of initial QUI concentrations on the separation factor  $R_L$  for the adsorption of QUI over MIL-101 and MIL-101(5%Sc).
